# Supplementary material for: Ketogenic Diets Induced Glucose Intolerance and Lipid Accumulation in Mice with Alterations in Gut Microbiota and Metabolites
Source: PubMed Central journal article supplement (PMC8092315; doi:10.1128/mbio.03601-20), 2021-03-30

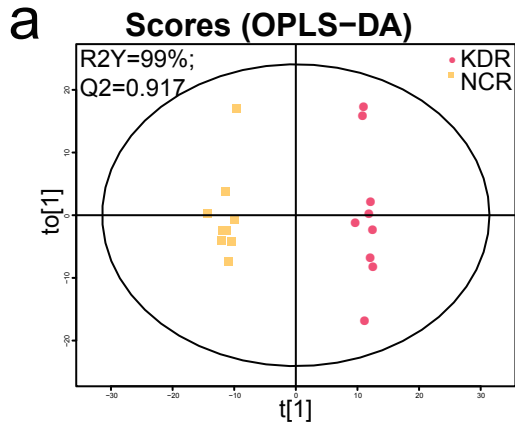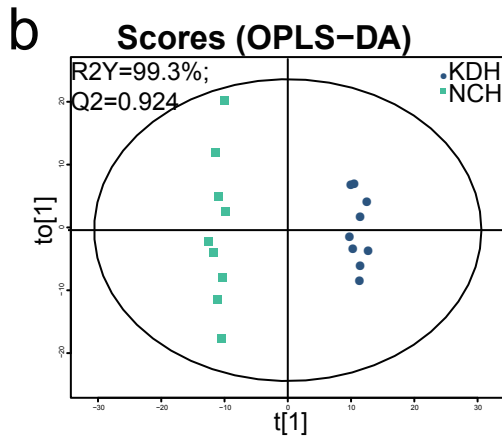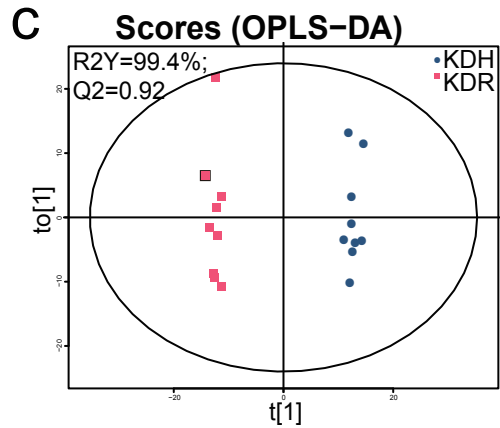

Supplement: mBio.03601-20-sf004.pdf [file mBio.03601-20-sf004.pdf]
