# Supplementary material for: Ketogenic Diets Induced Glucose Intolerance and Lipid Accumulation in Mice with Alterations in Gut Microbiota and Metabolites
Source: PubMed Central journal article supplement (PMC8092315; doi:10.1128/mbio.03601-20), 2021-03-30
Supplement: mBio.03601-20-sf006.pdf [file mBio.03601-20-sf006.pdf]

a

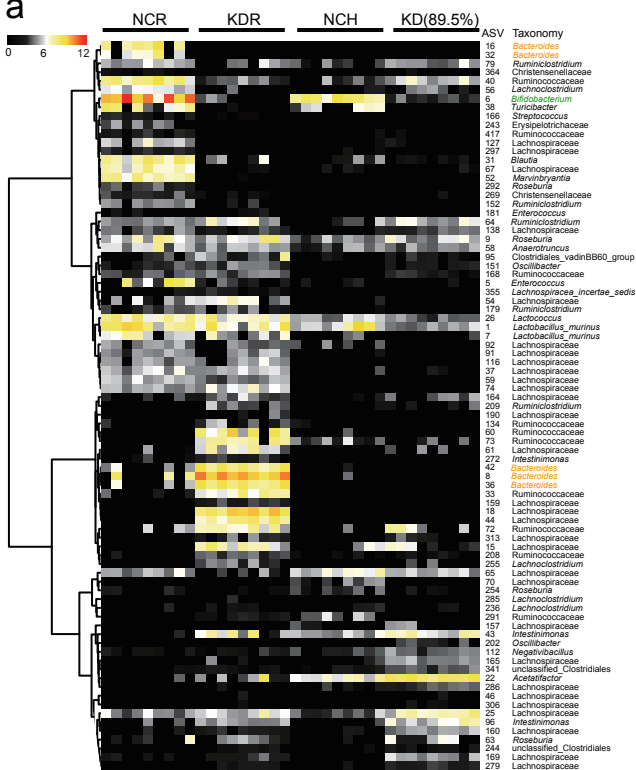

b

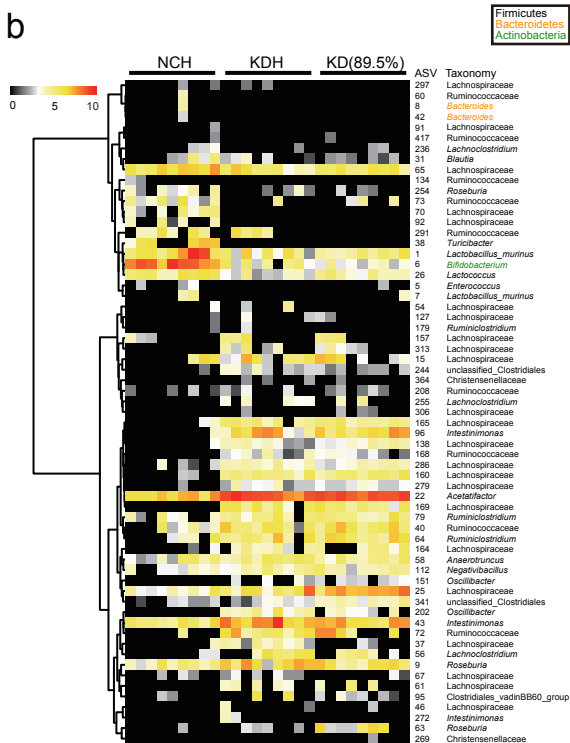

Firmicutes  
Bacteroidetes  
Actinobacteria
